# Supplementary material
Source: PubMed Central journal article supplement (PMC4381237)
Supplement: supp_nsu084_nsu084-suppl_data.pdf [file supp_nsu084_nsu084-suppl_data.pdf]

## Supplementary Methods

### Self-Other Affective Processing Task

*Supplementary Table 1. Examples of negative and positive, self- and other-directed statements used for the*

|               | Negative            | Positive             |
|---------------|---------------------|----------------------|
| Self-related  | "You are unwanted." | "You are wonderful." |
| Other-related | "He is horrible."   | "He is loved."       |

### FMRI Data Analysis

*Supplementary Table 2. Psychotropic medications and dosages for each diagnostic group*

| Group   | Participant | Medications and Dosages                                                                                   |
|---------|-------------|-----------------------------------------------------------------------------------------------------------|
| MDD     | 1           | Effexor XR (187.5 mg); Bupropion (300mg); BuSpar (40mg)                                                   |
|         | 2           | Wellbutrin XL (300mg); Ritalin LA (40mg)                                                                  |
|         | 3           | Temazepam( 2 mg per week), Zolpidem (10mg every other day), Mirtazapine (7.5mg), Provigil (100mg)         |
|         | 4           | Prozac (20mg, 3x a day)                                                                                   |
|         | 5           | Ambien (10mg); Suboxone (4 mg)                                                                            |
|         | 6           | none                                                                                                      |
|         | 7           | Paxil (60mg); Trazadone (30mg)                                                                            |
|         | 8           | Pristiq (50mg)                                                                                            |
|         | 9           | Lexapro (10mg)                                                                                            |
|         | 10          | Effexor (75mg, 2x a day)                                                                                  |
|         | 11          | none                                                                                                      |
|         | 12          | Cymbalta (60mg); Xanax (1mg); Ambien (10mg)                                                               |
|         | 13          | Lithium (1200mg); Prozac (60mg); Wellbutrin (300mg); Seroquel (100mg); Topamax (80mg); Propranolol (80mg) |
|         | 14          | none                                                                                                      |
|         | 15          | none                                                                                                      |
| MDD-SAD | 1           | none                                                                                                      |
|         | 2           | none                                                                                                      |
|         | 3           | Cymbalta (90mg), Prozac (10mg), Mirtazapine (30mg), Clonazepam (.25-.5mg)                                 |
|         | 4           | none                                                                                                      |
|         | 5           | Topamax (75mg), Ambien (10mg), Celexa (100mg), Wellbutrin (100mg)                                         |
|         | 6           | none                                                                                                      |
|         | 7           | Celexa (25mg)                                                                                             |
|         | 8           | Xanax (2-3mg), Lexapro (5mg)                                                                              |
|         | 9           | none                                                                                                      |
|         | 10          | Wellbutrin (300mg)                                                                                        |
|         | 11          | none                                                                                                      |
|         | 12          | none                                                                                                      |
|         | 13          | none                                                                                                      |
|         | 14          | none                                                                                                      |
|         | 15          | none                                                                                                      |
|         | 16          | Vyvanse (40mg)                                                                                            |
| SAD     | 1           | none                                                                                                      |
|         | 2           | none                                                                                                      |
|         | 3           | none                                                                                                      |
|         | 4           | none                                                                                                      |
|         | 5           | none                                                                                                      |
|         | 6           | none                                                                                                      |
|         | 7           | none                                                                                                      |
|         | 8           | none                                                                                                      |
|         | 9           | none                                                                                                      |
|         | 10          | none                                                                                                      |
|         | 11          | Trazodone (25mg); Citalopram (10mg)                                                                       |
|         | 12          | none                                                                                                      |
|         | 13          | Remeron (60mg); Lorazepam (.05 mg)                                                                        |
|         | 14          | Valium (2 mg)                                                                                             |
|         | 15          | none                                                                                                      |
|         | 16          | none                                                                                                      |

## **FMRI Data Acquisition**

BOLD data were acquired with a 3 Tesla General Electric Signa MR scanner. Following scout scanning, high order shimming was performed over the whole brain until diminishing returns on image distortion correction were met. Next, BOLD data were acquired with a single channel, whole-head imaging coil from 31 axial slices using a spiral pulse sequence (1) [repetition time (TR) = 2000 ms, echo time (TE) = 30 ms, flip angle = 80°, field of view (FOV) = 220 mm, number of frames per run = 125]. Axial slices had 3.44 mm<sup>2</sup> in-plane and 4 mm through-plane resolution. A high resolution structural scan (115 slices, 1 mm<sup>2</sup> in-plane and 1.5 mm through-plane resolution, TE = min, flip angle = 15°, FOV = 220 mm) was performed following BOLD scanning runs.

## **FMRI Image Preprocessing**

Preprocessing was performed with the AFNI imaging analysis suite (2). The first five acquisitions of each scanning run, recorded prior to onset of the task, were removed to allow for equilibration of the longitudinal magnetization vector. Then BOLD images were slice-time corrected to the sixteenth (middle) axial slice and motion corrected to the middle acquisition of the concatenated neuroimaging runs using Fourier interpolation. Data were then spatially smoothed with a 4 mm Gaussian kernel and temporally band-pass filtered, run-wise, at  $.0167 < f < .125$  Hz. Following this, time-series data were converted to units of percent signal change and resampled to 3 mm isotropic voxels in Talairach template space (3).

## Supplementary Results

### Button-pressing Task Data

We conducted a group- (CTL, MDD, SAD, MDD-SAD) by-condition (POS, NEG) analysis of variance on response accuracy data acquired during the button-pressing distractor task following each stimulus block. We found no significant effect of group, condition, or group-by-condition interactions in button-press response accuracy (all  $p > .20$ ).

## Results

### Participant Demographic and Clinical Characteristics

We conducted separate two-way [MDD (present, absent) by SAD (present, absent)] ANOVAs on age, depressive symptoms (BDI-II), and social anxiety symptoms (SPAI). There were no significant main effects or interaction for age (all  $F_s < 3.47$ , all  $p_s > .05$ ). The analyses on depressive and anxiety symptoms both yielded significant main effects of MDD,  $F(1,56) = 100.85$ , and  $F(1,54) = 23.52$ , respectively, both  $p_s < .05$ , and of SAD,  $F(1,56) = 13.88$ , and  $F(1,54) = 22.82$ , respectively, both  $p_s < .05$ ; the interaction of MDD and SAD was not significant in either analysis,  $F(1,56) = .63$ , and  $F(1,54) = 2.91$ , respectively, both  $p_s > .05$ . As expected, participants who had MDD or SAD reported more severe depressive and anxiety symptoms than did participants who did not have the disorder.

## Neural response

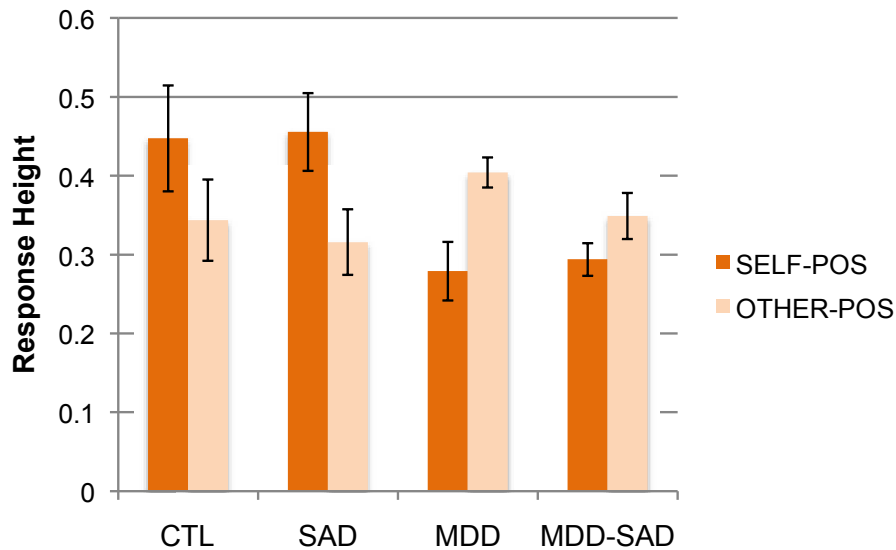

*Supplementary Figure 1.* Average (+/- standard error) response height of primary and association cortex [structures from Figure 1A and Table 3 (blue highlighted)] to self- and other-relevant positive information in CTL, SAD, MDD, and MDD-SAD groups.

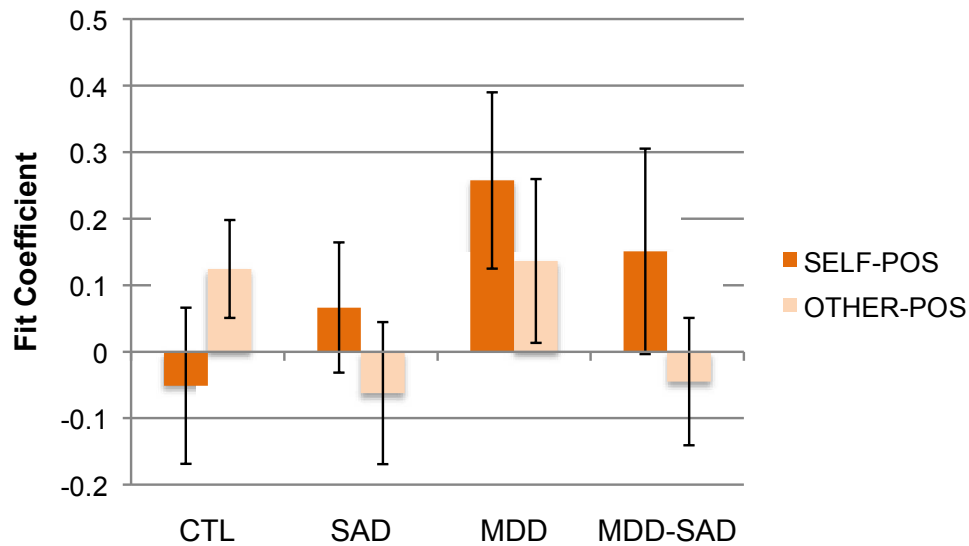

*Supplementary Figure 2.* Average (+/- standard error) connectivity between primary and association cortex [structures from Figure 1A and Table 3 (blue highlighted)] and ventral lateral and dorsal medial thalamic nuclei [structures from Figure 1B and Table 4 (blue highlighted)] during processing of self- and other-relevant positive information in CTL, SAD, MDD, and MDD-SAD groups.

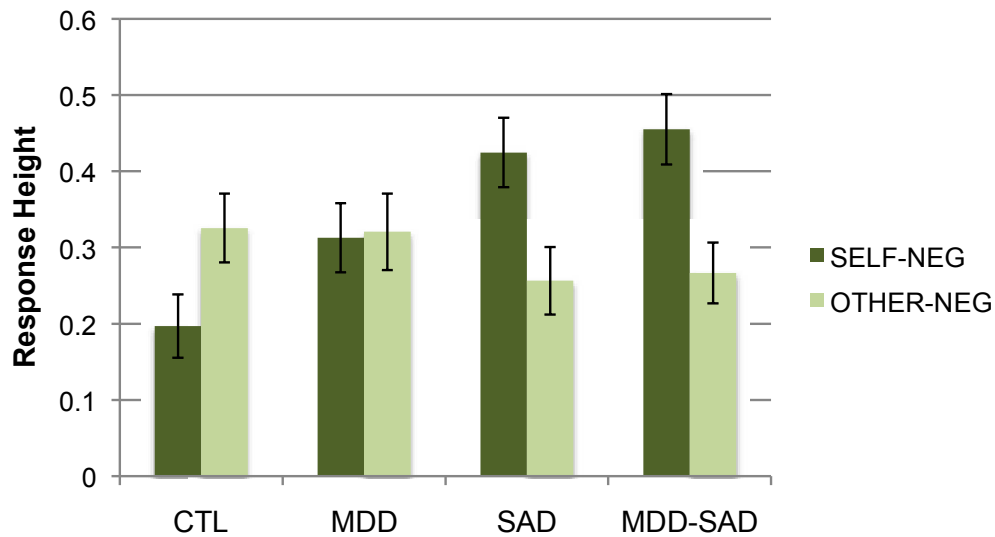

*Supplementary Figure 3.* Average (+/- standard error) response height of the right anterior insula [from Figure 2A and Table 3 (orange highlighted)] to self- and other-relevant negative information in CTL, SAD, MDD, and MDD-SAD groups.

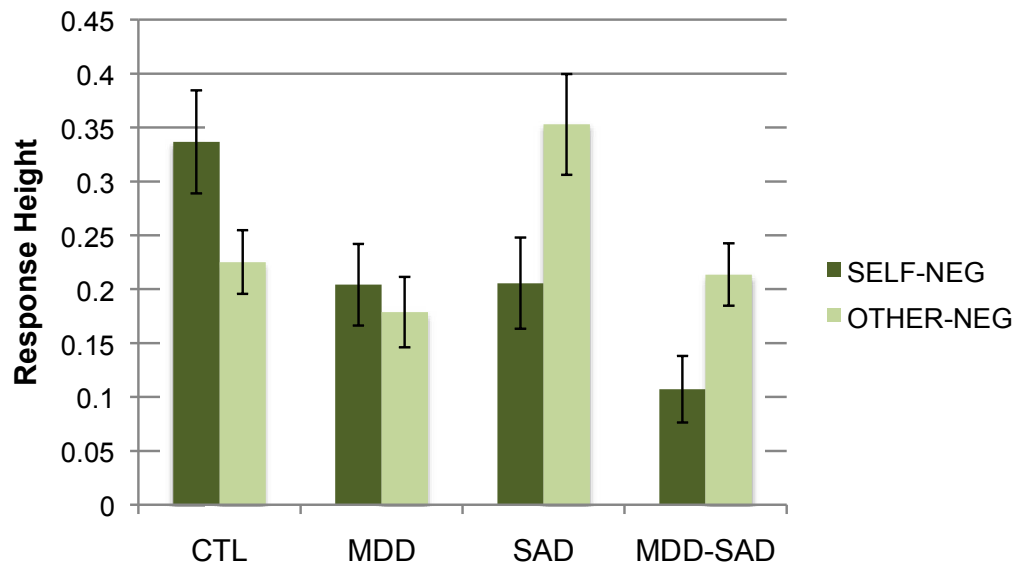

*Supplementary Figure 4.* Average (+/- standard error) response height of default-mode network structures [from Figure 2B and Table 3 (green highlighted)] to self- and other-relevant negative information in CTL, SAD, MDD, and MDD-SAD groups.

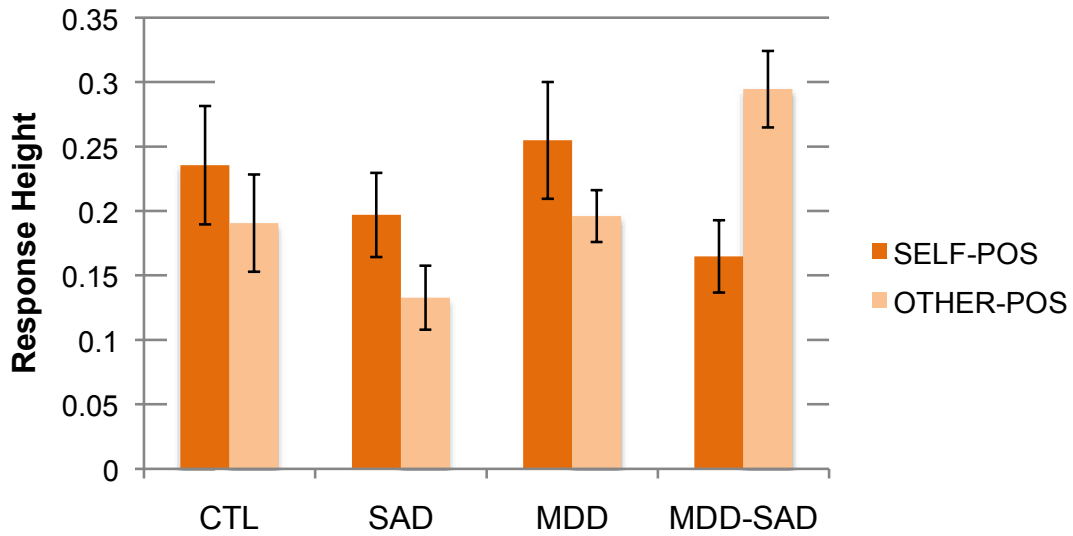

*Supplementary Figure 5.* Average (+/- standard error) response height of bilateral dorsal anterior cingulate cortex [from Figure 3 and Table 3 (purple highlighted)] to self- and other-relevant positive information in CTL, SAD, MDD, and MDD-SAD groups.

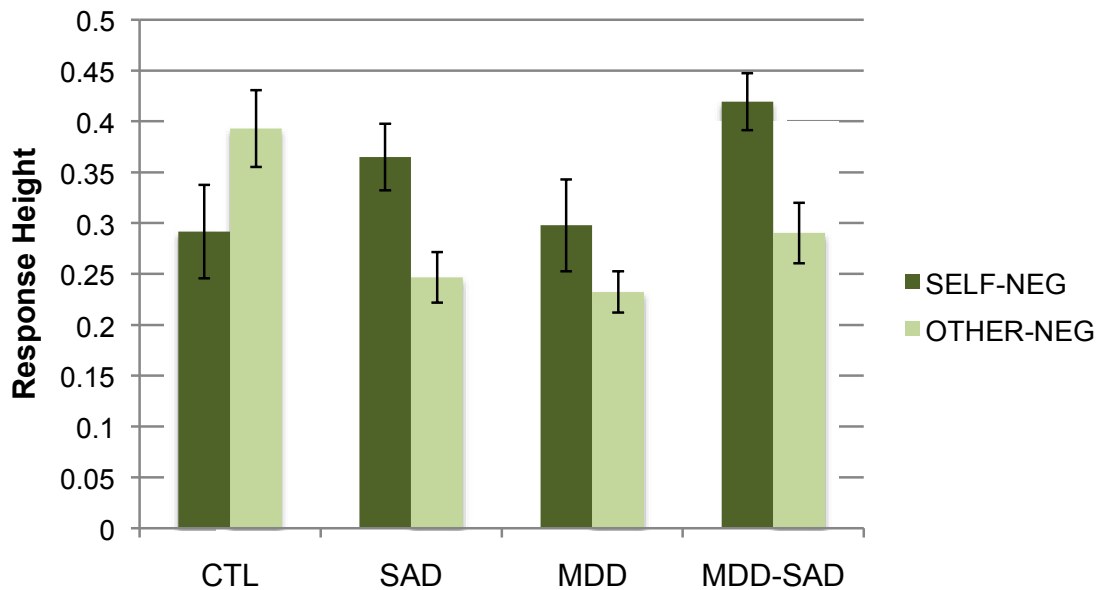

*Supplementary Figure 6.* Average (+/- standard error) response height of superior frontal gyrus at cortical midline [structures from Figure 4 and Table 3 (pink highlighted)] to self- and other-relevant negative information in CTL, MDD, SAD, and MDD-SAD groups.

Supplementary Table 3. Regions showing MDD-by-Valence, SAD-by-Valence, and MDD-by-SAD-by-Valence interactions with respect to onset of neural response

| Interaction                    | Structure                                             | Description                                                             | Voxels | X   | Y   | Z   |
|--------------------------------|-------------------------------------------------------|-------------------------------------------------------------------------|--------|-----|-----|-----|
| MDD-by-Valence                 | Left dorsolateral and ventrolateral prefrontal cortex | Slower onset for POS in MDD                                             | 301    | -35 | 34  | 18  |
|                                | Left inferior parietal lobule                         | Slower onset for POS in MDD                                             | 244    | -37 | -51 | 48  |
|                                | Right dorsolateral prefrontal cortex                  | Slower onset for POS in MDD                                             | 192    | 37  | 25  | 38  |
|                                | Bilateral lingual gyrus                               | Slower onset for POS in MDD                                             | 171    | 5   | -82 | -5  |
|                                | Right posterior medial temporal gyrus                 | Slower onset for POS in MDD                                             | 130    | 50  | -50 | -9  |
|                                | Right cerebellar vermis                               | Slower onset for POS in MDD                                             | 93     | 10  | -54 | -20 |
|                                | Right orbitofrontal cortex                            | Slower onset for POS in MDD                                             | 86     | 31  | 34  | -9  |
|                                | Left posterior medial temporal gyrus                  | Slower onset for POS in MDD                                             | 80     | -54 | -46 | 11  |
|                                | Right fusiform gyrus                                  | Slower onset for POS in MDD                                             | 78     | 30  | -73 | -14 |
|                                | Right superior parietal lobule                        | Slower onset for POS in MDD                                             | 61     | 33  | -67 | 44  |
|                                | Right dorsolateral prefrontal cortex                  | Slower onset for POS in MDD                                             | 49     | 6   | 28  | 50  |
|                                | Right inferior parietal lobule                        | Slower onset for POS in MDD                                             | 46     | 44  | -43 | 49  |
|                                | Right middle occipital gyrus                          | Faster onset for NEG in MDD                                             | 54     | 38  | -80 | 12  |
|                                | Left medial temporal gyrus                            | Faster onset for NEG in MDD                                             | 52     | -44 | 3   | -21 |
| Right superior parietal lobule | Faster onset for NEG in MDD                           | 48                                                                      | 15     | -55 | 59  |     |
| SAD-by-Valence                 | Right precuneus                                       | Slower onset for NEG in SAD                                             | 47     | 4   | 70  | 45  |
| MDD-by-SAD-by-Valence          | Right superior temporal gyrus                         | Slower onset for POS in MDD-SAD;<br>Faster onset for POS in MDD and SAD | 138    | 50  | 8   | 0   |
|                                | Left superior temporal gyrus                          | Slower onset for POS in MDD-SAD;<br>Faster onset for POS in MDD and SAD | 84     | -54 | -30 | 15  |
|                                | Bilateral dorsal anterior cingulate cortex            | Faster onset for POS in MDD and SAD                                     | 72     | 6   | 20  | 36  |
|                                | Right dorsolateral prefrontal cortex                  | Slower onset for POS in MDD-SAD;<br>Faster onset for POS in MDD and SAD | 70     | 26  | 51  | 17  |
|                                | Left supramarginal gyrus                              | Slower onset for POS in MDD-SAD;<br>Faster onset for POS in MDD         | 66     | -52 | -43 | 32  |
|                                | Left middle occipital gyrus                           | Faster onset for POS in MDD and SAD                                     | 48     | -48 | -60 | -8  |

1. Preston AR, Thomason ME, Ochsner KN, Cooper JC, Glover GH (2004): Comparison of spiral-in/out and spiral-out BOLD fMRI at 1.5 and 3T. *Neuroimage*. 21:291-301.
2. Cox RW (1996): AFNI: Software for analysis and visualization of functional magnetic resonance neuroimages. *Computers and Biomedical Research*. 29:162-173.
3. Talairach J, Tournoux P, Rayport M (1988): *Co-Planar Stereotaxic Atlas of the Human Brain*. Stuttgart, Germany: Thieme.
